# Supplementary material for: Response and survival predictors in a cohort of 319 patients with Waldenström macroglobulinemia treated with ibrutinib monotherapy
Source: PubMed Central journal article supplement — Blood Adv. 2022 Feb 4;6(3):1015–24. doi: 10.1182/bloodadvances.2021006106 (PMC8945307; doi:10.1182/bloodadvances.2021006106), 2022-02-04

## Predictors of response and survival in a large cohort of 319 Waldenström macroglobulinemia patients treated with ibrutinib monotherapy

### Supplemental data

**Table S1.** Indications to treat in 319 patients with WM treated with ibrutinib monotherapy. The total percentage is higher than 100% because some patients had more than one indication to treat.

| <b>Indications</b>      | <b>N (%)</b> |
|-------------------------|--------------|
| Anemia                  | 186 (58%)    |
| Constitutional symptoms | 96 (30%)     |
| Hyperviscosity          | 48 (15%)     |
| Extramedullary disease  | 29 (9%)      |
| Peripheral neuropathy   | 23 (7%)      |
| Thrombocytopenia        | 23 (7%)      |
| Cryoglobulinemia        | 4 (1%)       |
| Cold agglutinin disease | 2 (1%)       |

**Table S2.** Patients' characteristics according to CXCR4 mutational status

| <b>Characteristic</b>                       | <b>CXCR4 WT<br/>(n=155)</b> | <b>CXCR4 MUT<br/>(n=89)</b> | <b>P-value</b> |
|---------------------------------------------|-----------------------------|-----------------------------|----------------|
| Age >65 years, n(%)                         | 96 (62%)                    | 46 (52%)                    | 0.12           |
| Male sex                                    | 104 (67%)                   | 56 (63%)                    | 0.51           |
| Hemoglobin <11.5 g/dl                       | 109 (71%)                   | 64 (72%)                    | 0.91           |
| Platelet count <100 K/uL                    | 9 (6%)                      | 21 (24%)                    | <0.001         |
| Serum IgM level >4,000 mg/dl                | 58 (37%)                    | 43 (48%)                    | 0.10           |
| Serum IgM level >7,000 mg/dl                | 5 (3%)                      | 7 (8%)                      | 0.11           |
| Serum $\beta$ 2-microglobulin level >3 mg/l | 89 (70%)                    | 40 (59%)                    | 0.13           |
| Serum albumin level $\leq$ 3.5 g/dl         | 49 (33%)                    | 21 (25%)                    | 0.18           |
| Bone marrow involvement $\geq$ 60%          | 73 (52%)                    | 54 (64%)                    | 0.08           |
| IPSSWM                                      |                             |                             |                |
| Low                                         | 33 (24%)                    | 19 (25%)                    | 0.71           |
| Intermediate                                | 47 (35%)                    | 22 (29%)                    |                |
| High                                        | 55 (41%)                    | 34 (45%)                    |                |
| <i>MYD88</i> wild type                      | 4 (3%)                      | 0 (0%)                      | 0.13           |
| Previously treated                          | 105 (68%)                   | 60 (67%)                    | 0.96           |

WT: wildtype; MUT: mutated; IPSSWM: International Prognostic Scoring System for Waldenström Macroglobulinemia

**Table S3.** Patients' characteristics according to CXCR4 mutation subtype

| <b>Characteristic</b>                       | <b>CXCR4 NS<br/>(n=56)</b> | <b>CXCR4 FS<br/>(n=31)</b> | <b>P-value</b> |
|---------------------------------------------|----------------------------|----------------------------|----------------|
| Age >65 years, n (%)                        | 27 (48%)                   | 18 (58%)                   | 0.38           |
| Male sex                                    | 33 (59%)                   | 22 (71%)                   | 0.27           |
| Hemoglobin <11.5 g/dl                       | 38 (68%)                   | 26 (84%)                   | 0.10           |
| Platelet count <100 K/uL                    | 11 (20%)                   | 10 (32%)                   | 0.20           |
| Serum IgM level >4,000 mg/dl                | 28 (50%)                   | 15 (48%)                   | 0.89           |
| Serum IgM level >7,000 mg/dl                | 5 (9%)                     | 2 (6%)                     | 0.68           |
| Serum $\beta$ 2-microglobulin level >3 mg/l | 26 (55%)                   | 13 (65%)                   | 0.46           |
| Serum albumin level $\leq$ 3.5 g/dl         | 14 (26%)                   | 7 (23%)                    | 0.76           |
| Bone marrow involvement $\geq$ 60%          | 32 (58%)                   | 22 (79%)                   | 0.07           |
| IPSSWM                                      |                            |                            |                |
| Low                                         | 14 (29%)                   | 4 (17%)                    | 0.16           |
| Intermediate                                | 16 (33%)                   | 5 (21%)                    |                |
| High                                        | 19 (39%)                   | 15 (63%)                   |                |
| <i>MYD88</i> wild type                      | 0 (0%)                     | 0 (0%)                     | 1.00           |
| Previously treated                          | 36 (64%)                   | 22 (71%)                   | 0.53           |

NS: nonsense; FS: frameshift; IPSSWM: International Prognostic Scoring System for Waldenström Macroglobulinemia

**Table S4.** Univariate and multivariate logistic regression analyses for major and deep response in 319 patients with Waldenström macroglobulinemia treated with ibrutinib monotherapy using continuous variables.

| <b>Major response</b>        | <b>Univariate analysis</b> |                  | <b>Multivariate analysis</b> |                  |
|------------------------------|----------------------------|------------------|------------------------------|------------------|
| <b>Variables</b>             | <b>OR (95% CI)</b>         | <b>p</b>         | <b>OR (95% CI)</b>           | <b>p</b>         |
| Age at WM diagnosis, years   | 1.02 (0.99-1.04)           | 0.23             |                              |                  |
| Male sex                     | 1.19 (0.69-2.06)           | 0.53             |                              |                  |
| Hemoglobin level, g/dl       | 0.81 (0.70-0.94)           | <b>0.005</b>     | 0.83 (0.65-1.06)             | 0.14             |
| Platelet count, k/ul         | 1.00 (0.99-1.00)           | 0.19             |                              |                  |
| β2-microglobulin level, mg/l | 1.21 (1.01-1.47)           | <b>0.04</b>      | 1.00 (0.82-1.22)             | 0.97             |
| Albumin level, g/dl          | 0.73 (0.40-1.36)           | 0.33             |                              |                  |
| Serum IgM level, mg/dl       | 0.99 (0.99-1.00)           | 0.77             |                              |                  |
| Bone marrow, %               | 1.01 (1.00-1.02)           | <b>0.004</b>     | 1.01 (0.99-1.03)             | 0.14             |
| Previously treated           | 0.92 (0.52-1.64)           | 0.78             |                              |                  |
| <i>CXCR4 mutated</i>         | 0.33 (0.17-0.61)           | <b>&lt;0.001</b> | 0.19 (0.08-0.43)             | <b>&lt;0.001</b> |
| <i>CXCR4 WT</i>              | 1.00                       |                  | 1.00                         |                  |
| <i>CXCR4 NS</i>              | 0.24 (0.12-0.48)           | <b>&lt;0.001</b> | 0.14 (0.06-0.34)             | <b>&lt;0.001</b> |
| <i>CXCR4 FS</i>              | 0.69 (0.25-1.87)           | 0.47             | 0.49 (0.12-2.05)             | 0.33             |
| <b>Deep response</b>         | <b>Univariate analysis</b> |                  | <b>Multivariate analysis</b> |                  |
| <b>Variables</b>             | <b>OR (95% CI)</b>         | <b>p</b>         | <b>OR (95% CI)</b>           | <b>p</b>         |
| Age at WM diagnosis, years   | 0.99 (0.98-1.02)           | 0.94             |                              |                  |
| Male sex                     | 1.08 (0.65-1.82)           | 0.76             |                              |                  |
| Hemoglobin level, g/dl       | 0.83 (0.72-0.95)           | <b>0.009</b>     | 0.83 (0.65-1.04)             | 0.11             |
| Platelet count, k/ul         | 1.00 (1.00-1.01)           | <b>0.01</b>      | 1.00 (1.00-1.01)             | <b>0.01</b>      |
| β2-microglobulin level, mg/l | 1.05 (0.93-1.18)           | 0.44             |                              |                  |
| Albumin level, g/dl          | 0.56 (0.32-0.97)           | <b>0.04</b>      | 0.80 (0.36-1.77)             | 0.58             |
| Serum IgM level, mg/dl       | 0.99 (0.99-0.99)           | <b>0.001</b>     | 0.99 (0.99-0.99)             | <b>0.001</b>     |
| Bone marrow, %               | 1.01 (1.00-1.02)           | <b>0.04</b>      | 1.01 (0.99-1.02)             | 0.06             |
| Previously treated           | 1.31 (0.76-2.25)           | 0.33             |                              |                  |
| <i>CXCR4 mutated</i>         | 0.34 (0.18-0.66)           | <b>0.001</b>     | 0.39 (0.18-0.83)             | <b>0.01</b>      |
| <i>CXCR4 WT</i>              | 1.00                       |                  | 1.00                         |                  |
| <i>CXCR4 NS</i>              | 0.26 (0.11-0.61)           | <b>0.002</b>     | 0.29 (0.11-0.75)             | <b>0.01</b>      |
| <i>CXCR4 FS</i>              | 0.53 (0.21-1.31)           | 0.17             | 0.64 (0.22-1.85)             | 0.41             |

WT: wild type; NS: nonsense; FS: frameshift

MYD88 mutational status was not included as sample size for *MYD88* wild type status was small (n=8)

**Table S5.** Causes of death in 53 patients with WM treated with ibrutinib

| <b>Cause of death</b>       | <b>N (%)</b> |
|-----------------------------|--------------|
| WM progression              | 20 (40)      |
| Cardiac amyloidosis         | 4 (8)        |
| Lung infection              | 4 (8)        |
| Cardiac arrest/sudden death | 4 (8)        |
| Cerebrovascular accident    | 2 (4)        |
| Interstitial lung disease   | 2 (4)        |
| Heart failure               | 1 (2)        |
| Myocardial infarction       | 1 (2)        |
| Other cancers               | 8 (16)       |
| DLBCL                       | 3            |
| Esophageal cancer           | 2            |
| Head and neck cancer        | 1            |
| Prostate cancer             | 1            |
| Acute myeloid leukemia      | 1            |
| Unknown                     | 7 (14)       |

**Table S6.** Univariate and multivariate Cox proportional-hazard regression analyses for progression-free survival and overall survival in 319 patients with Waldenström macroglobulinemia treated with ibrutinib monotherapy using continuous variables.

| <b>Progression-free survival</b> | <b>Univariate analysis</b> |                  | <b>Multivariate analysis</b> |                  |
|----------------------------------|----------------------------|------------------|------------------------------|------------------|
| <b>Variables</b>                 | <b>HR (95% CI)</b>         | <b>p</b>         | <b>HR (95% CI)</b>           | <b>p</b>         |
| Age at WM diagnosis, years       | 1.00 (0.98-1.03)           | 0.82             |                              |                  |
| Male sex                         | 1.09 (0.67-1.78)           | 0.72             |                              |                  |
| Hemoglobin level, g/dl           | 0.86 (0.76-0.98)           | <b>0.02</b>      | 0.89 (0.75-1.05)             | 0.17             |
| Platelet count, k/ul             | 0.99 (0.99-0.99)           | <b>0.01</b>      | 0.99 (0.99-1.00)             | 0.07             |
| β2-microglobulin level, mg/l     | 1.09 (0.99-1.21)           | 0.08             |                              |                  |
| Albumin level, g/dl              | 0.59 (0.36-0.97)           | <b>0.04</b>      | 0.57 (0.31-1.06)             | 0.07             |
| Serum IgM level, mg/dl           | 0.99 (0.99-1.00)           | 0.56             |                              |                  |
| Bone marrow, %                   | 1.00 (0.98-1.00)           | 0.34             |                              |                  |
| Previously treated               | 1.40 (0.77-2.53)           | 0.27             |                              |                  |
| <i>CXCR4</i> mutated             | 2.31 (1.41-3.79)           | <b>0.001</b>     | 2.09 (1.23-3.56)             | <b>0.006</b>     |
| <i>CXCR4</i> WT                  | 1.00                       |                  |                              |                  |
| <i>CXCR4</i> NS                  | 2.93 (1.71-5.00)           | <b>&lt;0.001</b> | 2.76 (1.55-4.95)             | <b>0.001</b>     |
| <i>CXCR4</i> FS                  | 1.49 (0.68-3.23)           | 0.32             | 1.30 (0.58-2.90)             | 0.52             |
| <b>Overall survival</b>          | <b>Univariate analysis</b> |                  | <b>Multivariate analysis</b> |                  |
| <b>Variables</b>                 | <b>HR (95% CI)</b>         | <b>p</b>         | <b>HR (95% CI)</b>           | <b>p</b>         |
| Age at WM diagnosis, years       | 1.08 (1.05-1.11)           | <b>&lt;0.001</b> | 1.08 (1.04-1.12)             | <b>&lt;0.001</b> |
| Male sex                         | 1.55 (0.81-2.95)           | 0.18             |                              |                  |
| Hemoglobin level, g/dl           | 0.75 (0.63-0.88)           | <b>0.001</b>     | 0.80 (0.64-0.99)             | <b>0.047</b>     |
| Platelet count, k/ul             | 0.99 (0.99-0.99)           | <b>0.02</b>      | 0.99 (0.99-0.99)             | <b>0.045</b>     |
| β2-microglobulin level, mg/l     | 3.01 (1.27-7.18)           | <b>0.01</b>      | 0.99 (0.86-1.14)             | 0.87             |
| Albumin level, g/dl              | 0.45 (0.26-0.78)           | <b>0.005</b>     | 0.65 (0.31-1.35)             | 0.25             |
| Serum IgM level, mg/dl           | 1.00 (1.00-1.00)           | 0.40             |                              |                  |
| Bone marrow, %                   | 1.00 (0.99-1.01)           | 0.70             |                              |                  |
| Previously treated               | 1.46 (0.67-3.15)           | 0.34             |                              |                  |
| <i>CXCR4</i> mutated             | 1.37 (0.74-2.53)           | 0.31             |                              |                  |
| <i>CXCR4</i> WT                  | 1.00                       |                  |                              |                  |
| <i>CXCR4</i> NS                  | 1.42 (0.71-2.85)           | 0.32             |                              |                  |
| <i>CXCR4</i> FS                  | 1.49 (0.61-3.64)           | 0.39             |                              |                  |

WT: wild type; NS: nonsense; FS: frameshift

MYD88 mutational status was not included as the sample size for *MYD88* wildtype status was small (n=8)

**Figure S1.** Categorical response to ibrutinib monotherapy in 319 patients with WM (A), according to CXCR4 mutational status (B), and according to CXCR4 mutation subtype

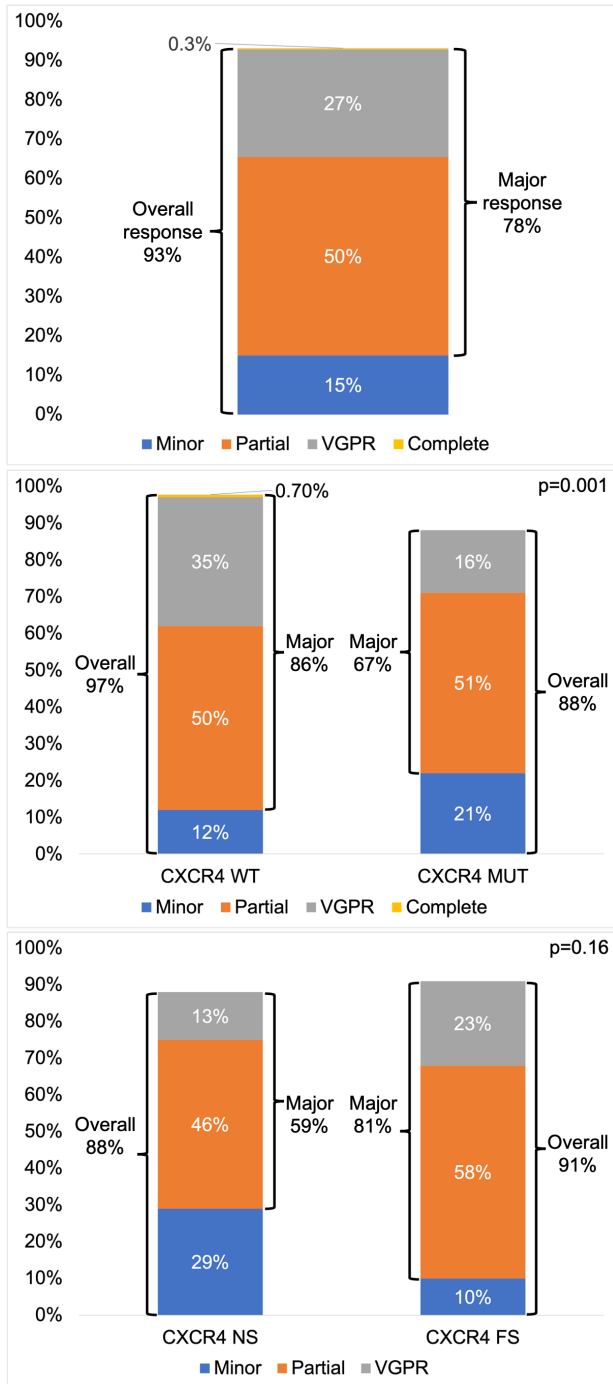

**Figure S2.** PFS estimates according to the proposed PFS score in patients age >65 years (A), ≤65 years (B), serum IgM level ≥4,000 mg/dl (C), serum IgM level <4,000 mg/dl (D), hemoglobin level <11.5 g/dl (E), hemoglobin level ≤11.5 g/dl (F), previously treated (G), and previously untreated (H)

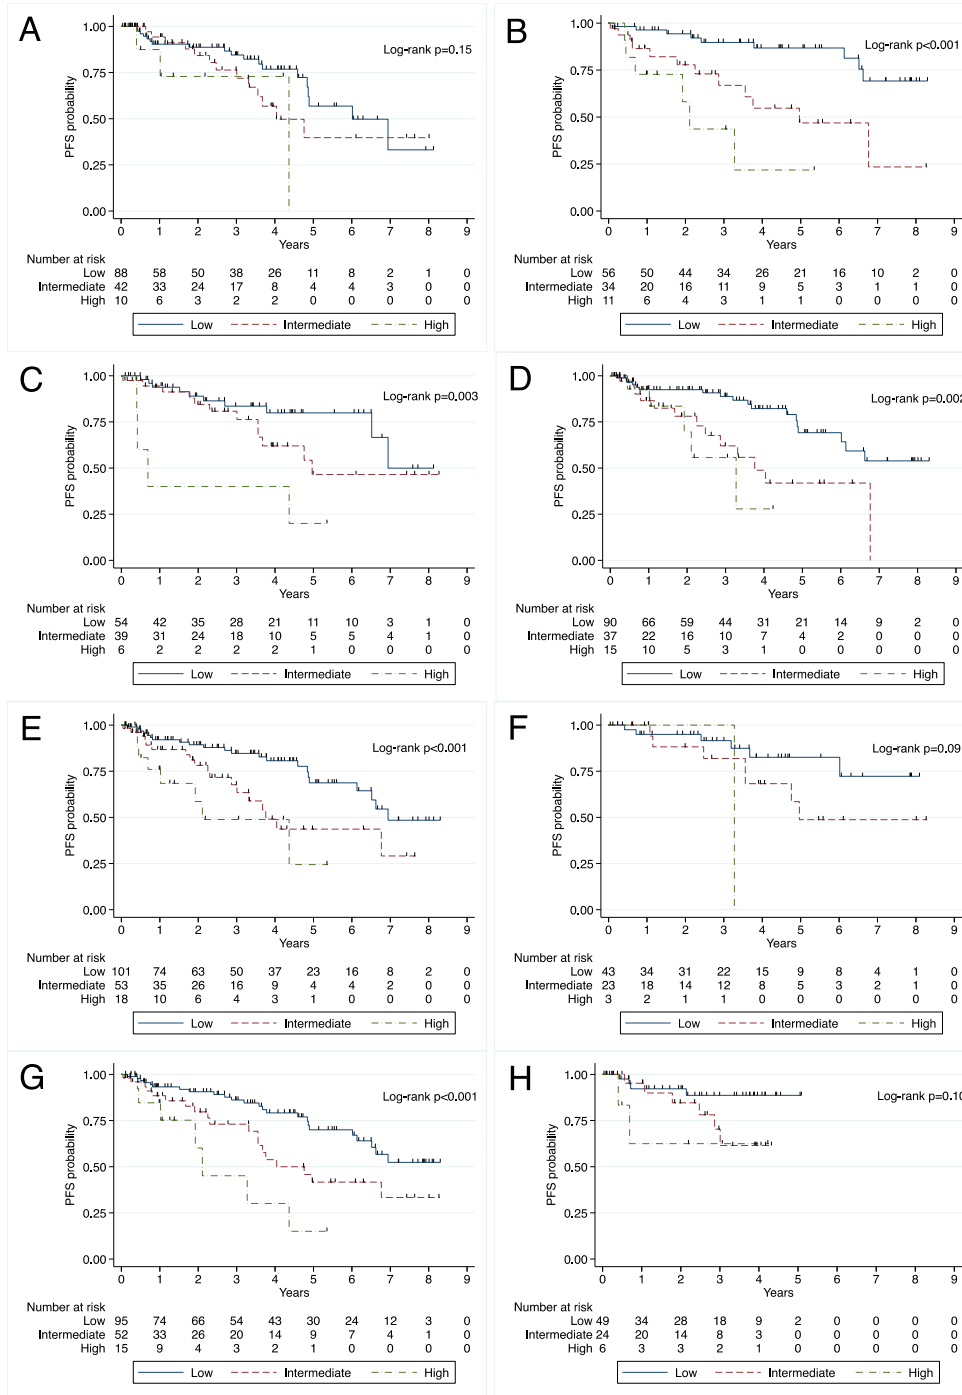

Supplement: advancesADV2021006106-suppl1.pdf [file advancesADV2021006106-suppl1.pdf]
